# Supplementary material for: A promising lead-free fluoride carbonate SHG material designed from a theoretical perspective
Source: Royal Society of Chemistry journal article supplement (doi:10.1039/c6dt04196e), 2017-01-01
Supplement: c6dt04196e1.pdf [file c6dt04196e1.pdf]

## Electronic supplementary information for

### A promising lead-free fluoride carbonates SHG material designed in a theoretical perspective

Jinyu Hu,<sup>a,b</sup> Zuju Ma,<sup>a</sup> Rongjian Sa,<sup>a</sup> and Kechen Wu<sup>a,\*</sup>

<sup>a</sup>State Key Laboratory of Structural Chemistry, Fujian Institute of Research on the Structure of Matter, Chinese Academy of Sciences, Fuzhou 350002, P.R. China

<sup>b</sup>University of Chinese Academy of Sciences, Beijing 100049, P.R. China

### Contents

|                                                                                                                                                                                                                              |    |
|------------------------------------------------------------------------------------------------------------------------------------------------------------------------------------------------------------------------------|----|
| Table S1 The comparison between experimental lattice parameters (Å), volume (Å <sup>3</sup> ), and band gap (eV) for CsPbCO <sub>3</sub> F and those calculated values using various exchange and correlation functions..... | S2 |
| Figure S1 Optimized ball-and-stick model of RbSnCO <sub>3</sub> F from different perspectives. ....                                                                                                                          | S3 |
| Figure S2 Calculated band structure of RbPbCO <sub>3</sub> F, CsPbCO <sub>3</sub> F, and RbSnCO <sub>3</sub> F. ....                                                                                                         | S4 |
| Figure S3 Calculated Loss Function of CsPbCO <sub>3</sub> F, RbPbCO <sub>3</sub> F, and RbSnCO <sub>3</sub> F.. ....                                                                                                         | S5 |
| Figure S4 Calculated conductivities of CsPbCO <sub>3</sub> F (a), RbPbCO <sub>3</sub> F (b), and RbSnCO <sub>3</sub> F (c). ....                                                                                             | S6 |
| Figure S5 Dispersion curves of refractive index of RbSnCO <sub>3</sub> F. ....                                                                                                                                               | S6 |
| References.....                                                                                                                                                                                                              | S7 |

---

\* E-mail: wkc@fjirsm.ac.cn

**Table S1** The comparison between experimental lattice parameters (Å), volume (Å<sup>3</sup>), and band gap (eV) for CsPbCO<sub>3</sub>F and those calculated values using various exchange and correlation functions. Percentage changes from experiments are given in units of % in parentheses. And the band gap calculated with nonlocal potentials PBE0 is 5.04 eV based on the PBE optimized structure of CsPbCO<sub>3</sub>F.

|        | <i>a</i>           | <i>c</i>           | Volume               | Band gap          |
|--------|--------------------|--------------------|----------------------|-------------------|
| LDA    | 5.312(-1.5)        | 4.874(-4.7)        | 119.11(-7.6)         | 3.252             |
| PBE    | 5.509 (2.1)        | 5.049 (-1.3)       | 132.71 (2.9)         | 3.54              |
| RPBE   | 5.609 (4.0)        | 5.150 (0.7)        | 140.29 (8.9)         | 3.42              |
| PBESOL | 5.411 (0.3)        | 4.961 (-3.1)       | 125.83 (-2.4)        | 3.35              |
| Exp.   | 5.393 <sup>1</sup> | 5.116 <sup>1</sup> | 128.861 <sup>1</sup> | 4.15 <sup>2</sup> |

<sup>1</sup> Ref.1    <sup>2</sup> Ref.2

**Figure S1** Optimized ball-and-stick model of  $\text{RbSnCO}_3\text{F}$  from different perspectives:  
in the  $ab$ -plane (a) and  $bc$ -plane (b).

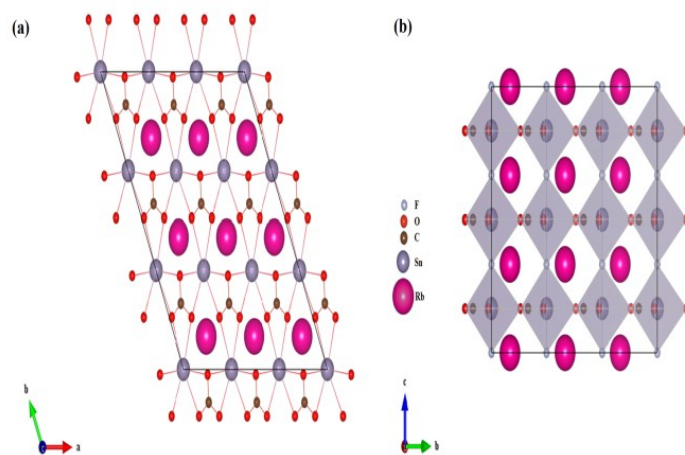

**Figure S2** Calculated band structure of  $\text{RbPbCO}_3\text{F}$ ,  $\text{CsPbCO}_3\text{F}$ , and  $\text{RbSnCO}_3\text{F}$ . The dispersion curves are shown along the directions  $G \rightarrow A \rightarrow H \rightarrow K \rightarrow G \rightarrow M \rightarrow L \rightarrow H$ , where  $G = (0, 0, 0)$ ,  $A = (0, 0, 1/2)$ ,  $H = (-1/3, 2/3, 1/2)$ ,  $K = (-1/3, 2/3, 0)$ ,  $M = (0, 1/2, 0)$  and  $L = (0, 1/2, 1/2)$ . The dashed line is the Fermi level.

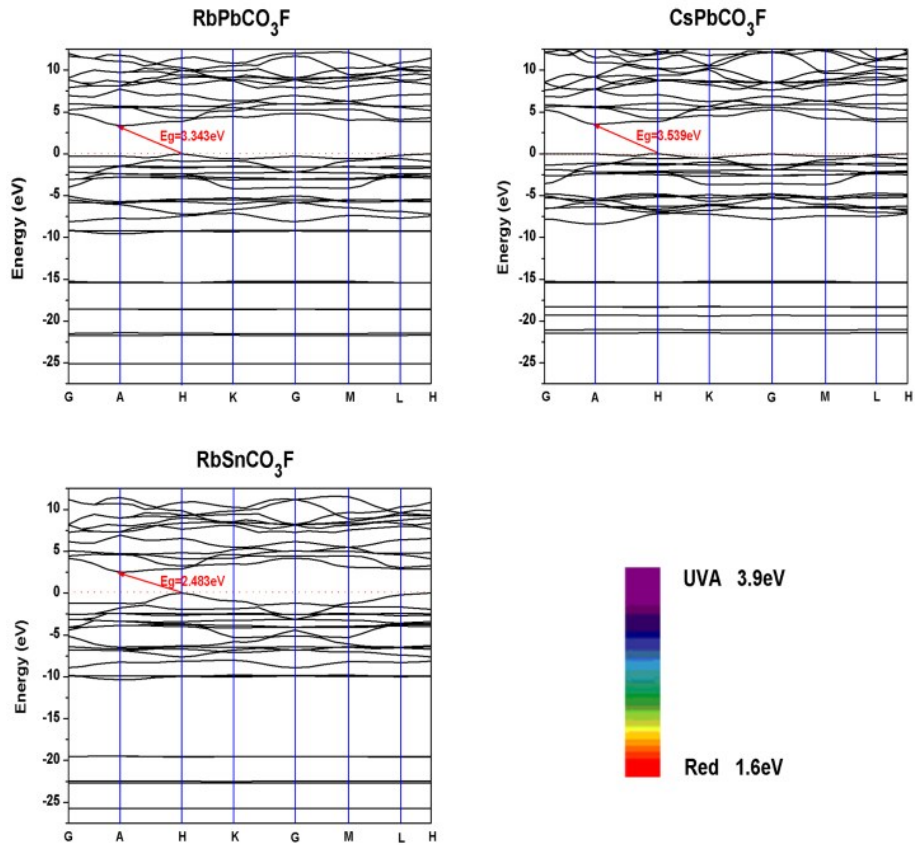

**Figure S3** Calculated Loss Function of CsPbCO<sub>3</sub>F, RbPbCO<sub>3</sub>F, and RbSnCO<sub>3</sub>F. Dark yellow and blue represent the [100] and [001] direction of CsPbCO<sub>3</sub>F. Pink and wine represent the [100] and [001] direction of RbPbCO<sub>3</sub>F. Besides, Cyan and green represent the [100] and [001] direction of RbSnCO<sub>3</sub>F.

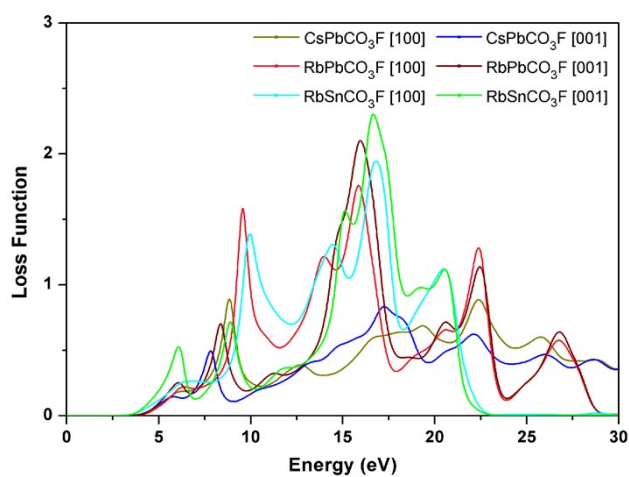

**Figure S4** Calculated conductivities of CsPbCO<sub>3</sub>F (a), RbPbCO<sub>3</sub>F (b), and RbSnCO<sub>3</sub>F (c).

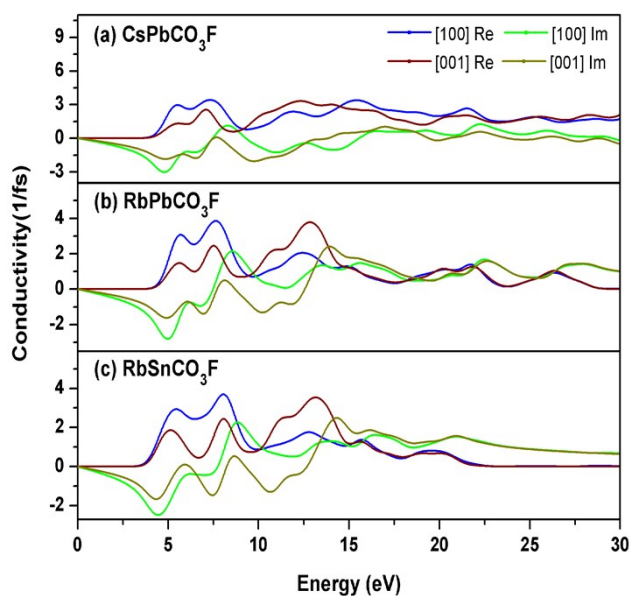

**Figure S5** Dispersion curves of refractive index of RbSnCO<sub>3</sub>F.

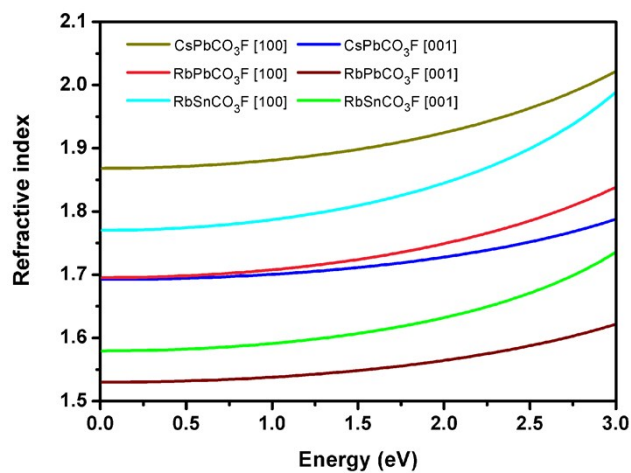

## Reference

- 1 T. T. Tran, P. S. Halasyamani and J. M. Rondinelli, *Inorg. Chem.*, 2014, **53**, 6241-6251.
- 2 G. Zou, L. Huang, N. Ye, C. Lin, W. Cheng and H. Huang, *J. Am. Chem. Soc.*, 2013, **135**, 18560-18566.
